# Supplementary material
Source: PubMed Central journal article supplement (PMC8922410)
Supplement: NIHMS1542251-supplement-1.pdf [file NIHMS1542251-supplement-1.pdf]

Supplemental Tabel 1. Use of psychotropic medications in the past 12 months in adults with or without Excessive Sleepiness in the NCS-R part II sample (n=5,692)

| OUTCOME: Use of psychotropic medication in the past 12 months | N of respondents reported use | Excessive Sleepiness |                   | OR (95% CI) <sup>1</sup>             | OR (95% CI) <sup>2</sup>  | OR (95% CI) <sup>3</sup>  | OR (95% CI) <sup>4</sup>  |
|---------------------------------------------------------------|-------------------------------|----------------------|-------------------|--------------------------------------|---------------------------|---------------------------|---------------------------|
|                                                               |                               | No                   | Yes               |                                      |                           |                           |                           |
|                                                               |                               | % (SE)               | % (SE)            | (Reference: No Excessive Sleepiness) |                           |                           |                           |
| Antidepressant                                                | 852                           | 7.6 (0.4)            | 18.9 (1.1)        | <b>2.83 (2.45 - 3.27)</b>            | <b>2.73 (2.31 - 3.24)</b> | <b>1.77 (1.43 - 2.19)</b> | <b>1.50 (1.20 - 1.87)</b> |
| Antipsychotic                                                 | 99                            | 0.9 (0.2)            | 1.9 (0.4)         | 2.10 (1.36 - 3.24)                   | 1.97 (1.25 - 3.09)        | 0.87 (0.51 - 1.47)        | 0.86 (0.48 - 1.54)        |
| Stimulant                                                     | 38                            | 0.4 (0.1)            | 0.9 (0.2)         | 2.33 (1.32 - 4.14)                   | 2.01 (1.13 - 3.59)        | 1.56 (0.82 - 2.95)        | 1.41 (0.64 - 3.09)        |
| Mood stabilizer/ anticonvulsant                               | 109                           | 0.8 (0.1)            | 2.5 (0.4)         | 3.22 (1.99 - 5.23)                   | 2.77 (1.69 - 4.56)        | 1.62 (0.93 - 2.81)        | 1.43 (0.77 - 2.66)        |
| Sedative                                                      | 153                           | 1.3 (0.3)            | 3.4 (0.5)         | 2.68 (1.68 - 4.26)                   | 2.50 (1.58 - 3.94)        | 1.33 (0.84 - 2.10)        | 1.13 (0.71 - 1.80)        |
| Z drug                                                        | 107                           | 1.1 (0.1)            | 2.4 (0.3)         | 2.28 (1.55 - 3.37)                   | 2.29 (1.57 - 3.35)        | 1.34 (0.86 - 2.08)        | 0.90 (0.56 - 1.46)        |
| Benzo                                                         | 401                           | 3.7 (0.4)            | 8.5 (0.7)         | 2.42 (1.91 - 3.07)                   | 2.33 (1.81 - 3.00)        | 1.50 (1.15 - 1.95)        | 1.19 (0.87 - 1.62)        |
| Non-Benzo                                                     | 41                            | 0.2 (0.1)            | 1.1 (0.2)         | 5.21 (2.92 - 9.30)                   | 4.80 (2.69 - 8.55)        | 2.78 (1.46 - 5.27)        | 2.46 (1.24 - 4.86)        |
| Barbiturate                                                   | 3                             | 0.0 (0.0)            | 0.2 (0.1)         | -                                    | -                         | -                         | -                         |
| Other                                                         | 31                            | 0.4 (0.1)            | 0.8 (0.2)         | 2.25 (0.94 - 5.39)                   | 2.36 (1.01 - 5.52)        | 2.05 (0.78 - 5.39)        | 2.12 (0.73 - 6.18)        |
| <b>Any medication</b>                                         | <b>1244</b>                   | <b>11.7 (0.5)</b>    | <b>26.4 (1.3)</b> | <b>2.70 (2.34 - 3.10)</b>            | <b>2.68 (2.30 - 3.12)</b> | <b>1.75 (1.48 - 2.08)</b> | <b>1.42 (1.17 - 1.73)</b> |

NOTE: % (SE) = prevalence (standard error); OR(95% CI) = Odds ratio and 95% confidence interval; <sup>1</sup> = univariate; <sup>2</sup> = adjusted for demographic characteristics (sex, age, race/ethnicity, family income, employment status); <sup>3</sup> = additionally adjusted for 12-month DSM-IV mental disorders; <sup>4</sup> = additionally adjusted for insomnia; - = not available due to small n; Figures in bold represent significant findings.

**Supplemental Table 2. Past-year DSM-IV mental disorders in adults with or without Ex.S in the NCS-R part II sample (n=5,692)**

| OUTCOME: 12-month DSM-IV<br>Mental Disorder | N of respondents<br>with mental disorder | Ex.S       |            | OR (95% CI)               |                           |                           |
|---------------------------------------------|------------------------------------------|------------|------------|---------------------------|---------------------------|---------------------------|
|                                             |                                          | No         | Yes        | 1                         | 2                         | 3                         |
|                                             |                                          | % (SE)     | % (SE)     | (Reference: No Ex.S)      |                           |                           |
| Anxiety Disorders                           | 1482                                     | 11.0 (0.6) | 33.9 (1.5) | <b>3.89 (3.27 - 4.62)</b> | <b>2.78 (2.34 - 3.31)</b> | <b>2.11 (1.76 - 2.54)</b> |
| Behavior Disorders                          | 240                                      | 1.8 (0.2)  | 7.1 (0.7)  | <b>3.85 (2.85 - 5.20)</b> | <b>2.11 (1.52 - 2.93)</b> | <b>1.66 (1.21 - 2.27)</b> |
| Eating Disorders                            | 90                                       | 0.8 (0.1)  | 2.0 (0.3)  | <b>2.29 (1.40 - 3.73)</b> | 1.32 (0.78 - 2.21)        | 0.91 (0.53 - 1.59)        |
| Mood Disorders                              | 822                                      | 5.0 (0.3)  | 20.4 (1.1) | <b>4.45 (3.60 - 5.50)</b> | <b>2.72 (2.18 - 3.39)</b> | <b>2.05 (1.61 - 2.61)</b> |
| Substance Use Disorders                     | 966                                      | 11.0 (0.7) | 21.3 (1.2) | <b>2.06 (1.67 - 2.54)</b> | <b>1.56 (1.27 - 1.91)</b> | <b>1.37 (1.11 - 1.70)</b> |
| <b>Any Mental Disorder</b>                  | 2406                                     | 22.5 (0.9) | 52.0 (1.8) | <b>3.57 (3.02 - 4.21)</b> | <b>3.57 (3.02 - 4.21)</b> | <b>2.49 (2.11 - 2.94)</b> |

NOTE: Ex.S= Excessive sleepiness plus associated symptoms; % (SE) = prevalence (standard error); OR(95% CI) = Odds ratio and 95% confidence interval; 1 = adjusted for demographic characteristics (sex, age, race/ethnicity, family income, employment status); 2 = additionally adjusted for any other 12-month DSM-IV mental disorders; 3 = additionally adjusted for insomnia symptoms; Anxiety = any of agoraphobia, generalized anxiety disorder, social phobia, specific phobia, panic disorder, post traumatic stress disorder, separation anxiety disorder; Behavior = any of attention deficit hyperactivity disorder, conduct disorder, oppositional defiant disorder; Eating = any of anorexia, bulimia, binge eating; Mood = any of major depressive disorder, dysthymia, bipolar I or II; Substance use = any of alcohol abuse/dependence, drug abuse/dependence, nicotine dependence. Numbers in bold represent significant findings.

**Supplemental Table 3. Physical conditions in adults with or without Ex.S in the NCS-R part II sample (n=5,692)**

| OUTCOME: physical condition   | N of respondents with physical disorders | ES <sup>+</sup> |            | OR (95% CI)               |                           |                           |
|-------------------------------|------------------------------------------|-----------------|------------|---------------------------|---------------------------|---------------------------|
|                               |                                          | No              | Yes        | 1                         | 2                         | 3                         |
|                               |                                          | % (SE)          | % (SE)     | (Reference: No Ex.S)      |                           |                           |
| Chronic pain                  | 2200                                     | 29.0 (0.8)      | 48.4 (2.1) | <b>2.43 (1.98 - 2.99)</b> | <b>2.04 (1.62 - 2.56)</b> | <b>1.58 (1.23 - 2.02)</b> |
| Stroke                        | 150                                      | 2.5 (0.4)       | 3.3 (0.4)  | <b>1.57 (1.04 - 2.37)</b> | 1.32 (0.87 - 2.01)        | 1.17 (0.73 - 1.85)        |
| Heart Attack                  | 186                                      | 3.4 (0.4)       | 4.4 (0.8)  | <b>1.62 (1.04 - 2.54)</b> | 1.44 (0.89 - 2.34)        | 1.36 (0.79 - 2.34)        |
| Heart Disease                 | 315                                      | 4.3 (0.4)       | 7.2 (0.8)  | <b>2.17 (1.59 - 2.95)</b> | <b>1.94 (1.42 - 2.64)</b> | <b>1.81 (1.30 - 2.51)</b> |
| Hypertension                  | 1379                                     | 22.7 (0.8)      | 28.4 (1.7) | <b>1.73 (1.38 - 2.18)</b> | <b>1.58 (1.26 - 1.97)</b> | <b>1.42 (1.14 - 1.78)</b> |
| Chronic lung disease          | 147                                      | 1.8 (0.2)       | 3.5 (0.5)  | <b>1.98 (1.34 - 2.91)</b> | <b>1.64 (1.04 - 2.59)</b> | 1.29 (0.85 - 1.95)        |
| Diabetes                      | 413                                      | 6.5 (0.4)       | 9.3 (0.9)  | <b>1.76 (1.37 - 2.26)</b> | <b>1.74 (1.35 - 2.23)</b> | <b>1.66 (1.32 - 2.07)</b> |
| Epilepsy                      | 135                                      | 1.6 (0.3)       | 2.5 (0.4)  | 1.42 (0.87 - 2.32)        | 1.33 (0.79 - 2.23)        | 1.21 (0.66 - 2.21)        |
| Cancer                        | 383                                      | 6.4 (0.6)       | 7.1 (0.8)  | 1.22 (0.87 - 1.70)        | 1.12 (0.79 - 1.58)        | 0.98 (0.64 - 1.48)        |
| <b>Any physical condition</b> | 3244                                     | 49.3 (1.0)      | 66.2 (2.0) | <b>2.64 (2.06 - 3.39)</b> | <b>2.17 (1.66 - 2.83)</b> | <b>1.67 (1.26 - 2.21)</b> |

NOTE: Ex.S= Excessive sleepiness plus associated symptoms; % (SE) = prevalence (standard error); OR(95% CI) = Odds ratio and 95% confidence interval; 1 = adjusted for demographic characteristics (sex, age, race/ethnicity, family income, employment status); 2= additionally adjusted for any other 12-month DSM-IV mental disorders; 3 = additionally adjusted for insomnia symptoms; Physical conditions reported based on a checklist. Numbers in bold represent significant findings.

Supplement Table 4. Associations of excessive sleepiness and past-year DSM-IV mental disorders, physical condition and WHODAS-II domain scores in the NCS-R part II sample (n=5,692)

| Past year DSM-IV disorder, physical condition, and WHODAS-II domain | 5-level categorical excessive sleepiness |                           |                           |                           |                                     |
|---------------------------------------------------------------------|------------------------------------------|---------------------------|---------------------------|---------------------------|-------------------------------------|
|                                                                     | Daytime Sleepiness                       |                           |                           |                           | No daytime sleepiness & no Ex.S sxs |
|                                                                     | with no other Ex.S sxs                   | with any 1 Ex.S sxs       | with any 2 Ex.S sxs       | with all 3 Ex.S sxs       |                                     |
|                                                                     | OR (95% CI)                              | OR (95% CI)               | OR (95% CI)               | OR (95% CI)               |                                     |
| Anxiety                                                             | <b>1.29 (1.03 - 1.61)</b>                | <b>1.69 (1.36 - 2.09)</b> | <b>2.41 (1.86 - 3.13)</b> | <b>2.88 (2.28 - 3.64)</b> | Reference                           |
| Behavior                                                            | 0.64 (0.35 - 1.16)                       | 0.95 (0.63 - 1.44)        | 1.51 (0.95 - 2.41)        | 1.79 (1.00 - 3.20)        | Reference                           |
| Eating                                                              | 0.58 (0.19 - 1.75)                       | 0.60 (0.25 - 1.43)        | 0.72 (0.31 - 1.67)        | 0.80 (0.30 - 2.14)        | Reference                           |
| Mood                                                                | 1.09 (0.75 - 1.58)                       | <b>1.74 (1.25 - 2.43)</b> | <b>2.13 (1.57 - 2.88)</b> | <b>2.21 (1.40 - 3.47)</b> | Reference                           |
| Substance Use                                                       | 1.33 (0.97 - 1.83)                       | <b>1.41 (1.13 - 1.77)</b> | <b>1.70 (1.21 - 2.39)</b> | 1.38 (0.95 - 2.01)        | Reference                           |
| <b>Any Mental disorder</b>                                          | 1.34 (1.00 - 1.80)                       | <b>1.94 (1.60 - 2.34)</b> | <b>3.10 (2.46 - 3.89)</b> | <b>3.32 (2.58 - 4.28)</b> | Reference                           |
| Chronic pain                                                        | <b>1.45 (1.13 - 1.86)</b>                | <b>1.40 (1.09 - 1.80)</b> | <b>2.17 (1.36 - 3.48)</b> | <b>1.84 (1.37 - 2.48)</b> | Reference                           |
| Stroke                                                              | 0.71 (0.38 - 1.33)                       | 1.08 (0.55 - 2.12)        | 1.04 (0.55 - 1.98)        | 0.79 (0.28 - 2.18)        | Reference                           |
| Heart Attack                                                        | 0.80 (0.37 - 1.71)                       | 1.40 (0.62 - 3.15)        | 1.24 (0.70 - 2.19)        | 0.85 (0.32 - 2.24)        | Reference                           |
| Heart Disease                                                       | 0.90 (0.54 - 1.51)                       | 1.44 (0.94 - 2.21)        | <b>2.14 (1.25 - 3.67)</b> | 1.46 (0.73 - 2.93)        | Reference                           |
| Hypertension                                                        | 1.22 (0.83 - 1.81)                       | <b>1.44 (1.06 - 1.95)</b> | <b>1.48 (1.10 - 1.99)</b> | 1.31 (0.92 - 1.85)        | Reference                           |
| Chronic lung disease                                                | 0.85 (0.33 - 2.22)                       | 1.17 (0.59 - 2.32)        | 1.18 (0.59 - 2.36)        | 1.20 (0.59 - 2.47)        | Reference                           |
| Diabetes                                                            | 0.91 (0.53 - 1.58)                       | <b>1.48 (1.02 - 2.16)</b> | <b>1.87 (1.21 - 2.88)</b> | 1.17 (0.64 - 2.16)        | Reference                           |
| Epilepsy                                                            | 0.55 (0.24 - 1.23)                       | 0.49 (0.22 - 1.12)        | <b>2.21 (1.05 - 4.64)</b> | 0.80 (0.37 - 1.74)        | Reference                           |
| Cancer                                                              | 1.18 (0.73 - 1.92)                       | 0.85 (0.45 - 1.62)        | 1.14 (0.70 - 1.87)        | 1.17 (0.69 - 1.98)        | Reference                           |
| <b>Any physical condition</b>                                       | <b>1.91 (1.36 - 2.66)</b>                | <b>1.58 (1.15 - 2.15)</b> | <b>2.19 (1.38 - 3.46)</b> | <b>1.90 (1.31 - 2.75)</b> | Reference                           |
| Self-Care                                                           | 0.82 (0.46 - 1.47)                       | 0.75 (0.36 - 1.58)        | 1.38 (0.70 - 2.74)        | 1.80 (0.99 - 3.27)        | Reference                           |
| Mobility                                                            | 0.72 (0.37 - 1.39)                       | 1.17 (0.61 - 2.24)        | <b>2.26 (1.32 - 3.88)</b> | <b>2.43 (1.32 - 4.48)</b> | Reference                           |
| Cognition                                                           | 0.69 (0.43 - 1.09)                       | 1.22 (0.80 - 1.86)        | 1.46 (0.89 - 2.39)        | <b>2.92 (1.86 - 4.60)</b> | Reference                           |
| Social interaction                                                  | 0.70 (0.43 - 1.16)                       | 1.24 (0.73 - 2.12)        | <b>1.86 (1.07 - 3.25)</b> | <b>2.90 (1.81 - 4.63)</b> | Reference                           |
| Role impairment                                                     | 0.89 (0.56 - 1.42)                       | 1.06 (0.70 - 1.61)        | <b>1.64 (1.22 - 2.21)</b> | <b>1.98 (1.21 - 3.22)</b> | Reference                           |
| <b>Global score</b>                                                 | 0.91 (0.47 - 1.73)                       | 0.76 (0.46 - 1.25)        | <b>1.71 (1.04 - 2.82)</b> | <b>2.25 (1.16 - 4.37)</b> | Reference                           |

NOTE: % (SE) = prevalence (standard error); OR(95% CI) = Odds ratio and 95% confidence interval, using 5-level excessive sleepiness as dependent variable, mental disorders, physical conditions, WHODAS-II domain variables as independent variable in multinomial logistic regression models, fully controlling for demographic characteristics (sex, age, race/ethnicity, family income, employment status, BMI), past-year DSM-IV mental disorders, insomnia, and use of any psychotropic medication; Ex.S sxs= Excessive sleepiness and associated symptoms that included tendency to fall asleep in permissive situations, not slept enough despite spending enough time in bed, and difficulty getting up in the morning. Numbers in bold represent significant findings
